# Supplementary material for: Noninvasive Deep Brain Stimulation via Temporally Interfering Electric Fields
Source: PubMed Central journal article supplement (PMC5520675; doi:10.1016/j.cell.2017.05.024), 2017-06-01
Supplement: NIHMS878842-supplement-6.pdf [file NIHMS878842-supplement-6.pdf]

**SUPPLEMENTAL TABLES**

**Table S1. Interferential neural activation in intact mouse brain** (Related to Figure 1)

**Cortex**

| Group number | Group name                                         | Group mean ( $\pm$ st.d.) firing frequency (Hz) |
|--------------|----------------------------------------------------|-------------------------------------------------|
| 1            | Firing rate during 10 Hz stimulation               | 9.97 ( $\pm$ 0.85)                              |
| 2            | Firing rate during 1 kHz + 1.01 kHz TI stimulation | 10.2 ( $\pm$ 0.83)                              |
| 3            | Firing rate during 2 kHz + 2.01 kHz TI stimulation | 9.7 ( $\pm$ 0.85)                               |
| 4            | Firing rate during 1 kHz stimulation               | 0.2 ( $\pm$ 0.45)                               |
| 5            | Firing rate during 2 kHz stimulation               | 0.4 ( $\pm$ 0.31)                               |
| 6            | Spontaneous firing rate                            | 0.35 ( $\pm$ 0.6)                               |

**ANOVA firing rates, cortex**

| Source | SS   | df | MS    | F     | Prob>F  |
|--------|------|----|-------|-------|---------|
| Groups | 1122 | 5  | 224.5 | 502.6 | 2.8E-38 |
| Error  | 20.1 | 45 | 0.44  |       |         |
| Total  | 1142 | 50 |       |       |         |

**Post-hoc multiple comparison test for neural firing rates, cortex**

| Group A | Group B | Mean (Group A – Group B) | 95% CI (Group A – Group B) | p-value  |
|---------|---------|--------------------------|----------------------------|----------|
| 1       | 2       | -1.39                    | -0.23 0.91                 | 1.00E+00 |
| 1       | 3       | -0.78                    | 0.32 1.43                  | 1        |
| 1       | 4       | 8.56                     | 9.77 10.98                 | 7.79E-27 |
| 1       | 5       | 8.41                     | 9.57 10.72                 | 2.19E-27 |
| 1       | 6       | 8.72                     | 9.63 10.54                 | 6.57E-32 |
| 2       | 3       | -0.58                    | 0.56 1.71                  | 1.00E+00 |
| 2       | 4       | 8.75                     | 10.01 11.26                | 1.16E-26 |
| 2       | 5       | 8.61                     | 9.8 11.0                   | 3.71E-27 |
| 2       | 6       | 8.91                     | 9.87 10.84                 | 2.84E-31 |
| 3       | 4       | 8.23                     | 9.44 10.66                 | 3.25E-26 |
| 3       | 5       | 8.09                     | 9.24 10.39                 | 9.45E-27 |
| 3       | 6       | 8.4                      | 9.31 10.22                 | 2.92E-31 |
| 4       | 5       | -1.45                    | -0.2 1.05                  | 1.00E+00 |
| 4       | 6       | -1.17                    | -0.13 0.90                 | 1        |
| 5       | 6       | -0.89                    | 0.07 1.03                  | 1.00E+00 |

## Hippocampus

| Group number | Group name                                         | Group mean ( $\pm$ st.d.) firing frequency (Hz) |
|--------------|----------------------------------------------------|-------------------------------------------------|
| 1            | Firing rate during 10 Hz stimulation               | 9.74 ( $\pm$ 0.49)                              |
| 2            | Firing rate during 2 kHz + 2.01 kHz TI stimulation | 10.22 ( $\pm$ 0.61)                             |
| 3            | Firing rate during 2 kHz stimulation               | 0.2 ( $\pm$ 0.47)                               |
| 4            | Spontaneous firing rate                            | 0.45 ( $\pm$ 1.06)                              |

## ANOVA firing rates, hippocampus

| Source | SS    | df | MS    | F      | Prob>F   |
|--------|-------|----|-------|--------|----------|
| Groups | 816   | 3  | 272.1 | 390.83 | 2.09E-26 |
| Error  | 23.7  | 34 | 0.691 |        |          |
| Total  | 839.8 | 37 |       |        |          |

## Post-hoc multiple comparison test for neural firing rates, hippocampus

| Group A | Group B | Mean (Group A – Group B) | 95% CI (Group A – Group B) | p-value |          |
|---------|---------|--------------------------|----------------------------|---------|----------|
| 1       | 2       | -1.74                    | -0.48                      | 0.77    | 1        |
| 1       | 3       | 8.12                     | 9.54                       | 10.95   | 8.05E-19 |
| 1       | 4       | 8.17                     | 9.26                       | 10.36   | 5.93E-22 |
| 2       | 3       | 8.69                     | 10.02                      | 11.36   | 2.55E-20 |
| 2       | 4       | 8.76                     | 9.75                       | 10.73   | 3.74E-24 |
| 3       | 4       | -1.44                    | -0.27                      | 0.9     | 1        |
